# Supplementary material for: LDLR is used as a cell entry receptor by multiple alphaviruses
Source: PubMed Central journal article supplement (PMC10799924; doi:10.1038/s41467-024-44872-5), 2024-01-20
Supplement: 41467_2024_44872_MOESM1_ESM.pdf [file 41467_2024_44872_MOESM1_ESM.pdf]

# Supplementary Information

## **LDLR is used as a cell entry receptor by multiple alphaviruses**

Xiaofeng Zhai<sup>1#</sup>, Xiaoling Li<sup>1#</sup>, Michael Veit<sup>2#</sup>, Ningning Wang<sup>1</sup>, Yu Wang<sup>1</sup>, Andres Merits<sup>3</sup>, Zhiwen Jiang<sup>1</sup>, Yan Qin<sup>1</sup>, Xiaoguang Zhang<sup>1</sup>, Kaili Qi<sup>1</sup>, Houqi Jiao<sup>1</sup>, Wan-Ting He<sup>1</sup>, Ye Chen<sup>4</sup>, Yang Mao<sup>5\*</sup>, Shuo Su<sup>1\*</sup>

<sup>1</sup> Engineering Laboratory of Animal Immunity of Jiangsu Province, College of Veterinary Medicine, Academy for Advanced Interdisciplinary Studies, Nanjing Agricultural University, Nanjing, China.

<sup>2</sup> Institute for Virology, Center for Infection Medicine, Veterinary Faculty, Free University Berlin, Berlin, Germany.

<sup>3</sup> Institute of Technology, University of Tartu, Nooruse Street 1, 50411, Tartu, Estonia.

<sup>4</sup> Key Laboratory of animal pathogen infection and Immunology of Fujian Province, College of Animal Sciences, Fujian Agriculture and Forestry University, Fuzhou 350002, China.

<sup>5</sup> School of Pharmaceutical Sciences and National-Local Joint Engineering Laboratory of Druggability and New Drugs Evaluation, Sun Yat-sen University, Guangzhou, China.

\*Corresponding author.

#Contributed equally.

E-mail: Shuo Su (shuosu@njau.edu.cn); Yang Mao (maoyang3@mail.sysu.edu.cn);

# Supplementary Fig. 1

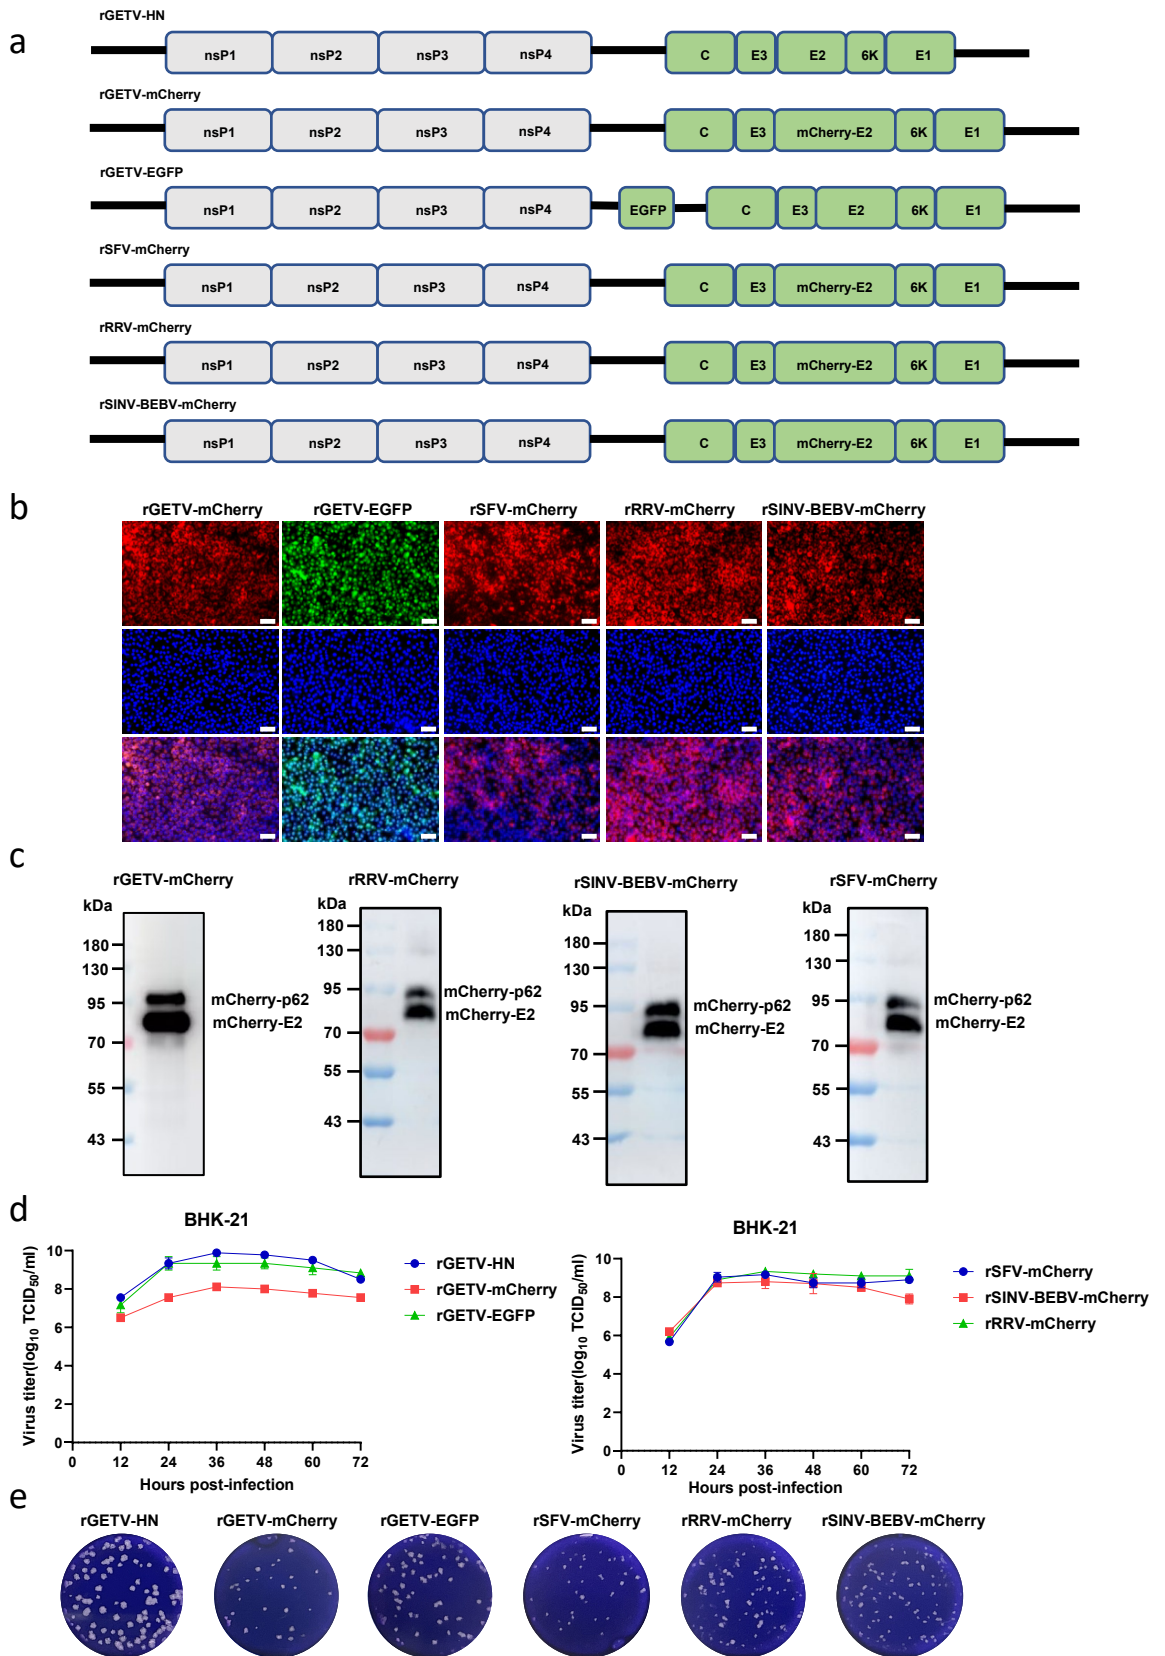

**Supplementary Fig. 1 Generation of replication-competent alphaviruses harboring reporter genes.** **a**, Schematic illustration of the genomes of rGETV-HN, rGETV-mCherry, rGETV-EGFP, rSFV-mCherry, rRRV-mCherry and rSINV-BEBV-mCherry. **b**, Expression of fluorescent proteins in BHK-21 cells infected with the rGETV-mCherry, rGETV-EGFP, rSFV-mCherry, rRRV-mCherry and rSINV-BEBV-mCherry. Nuclei were counterstained with DAPI. Scale bar, 250  $\mu$ m. **c**, Expression of mCherry-E2 and mCherry-p62 fusion proteins in rGETV-mCherry, rRRV-mCherry, rSINV-BEBV-mCherry, and rSFV-mCherry infected cells was analyzed by western blot. Bands corresponding to fusion proteins were detected using anti-mCherry antibody. **d**, One-step growth curves of the rGETV-HN, rGETV-mCherry, rGETV-EGFP (left panel), rSFV-mCherry, rRRV-mCherry and rSINV-BEBV-mCherry (right panel). BHK-21 cells were infected with different viruses at an MOI of 0.01. Titers are shown in TCID<sub>50</sub> per ml. Mean  $\pm$  SD of 3 independent experiments are shown. **e**, The plaques of the rGETV-HN, rGETV-mCherry, rGETV-EGFP, rSFV-mCherry, rRRV-mCherry and rSINV-BEBV-mCherry on BHK-21 cells. The experiment was performed twice with similar results. Molecular masses are indicated in kDa (**c**). Source data are provided as a Source Data file.

# Supplementary Fig. 2

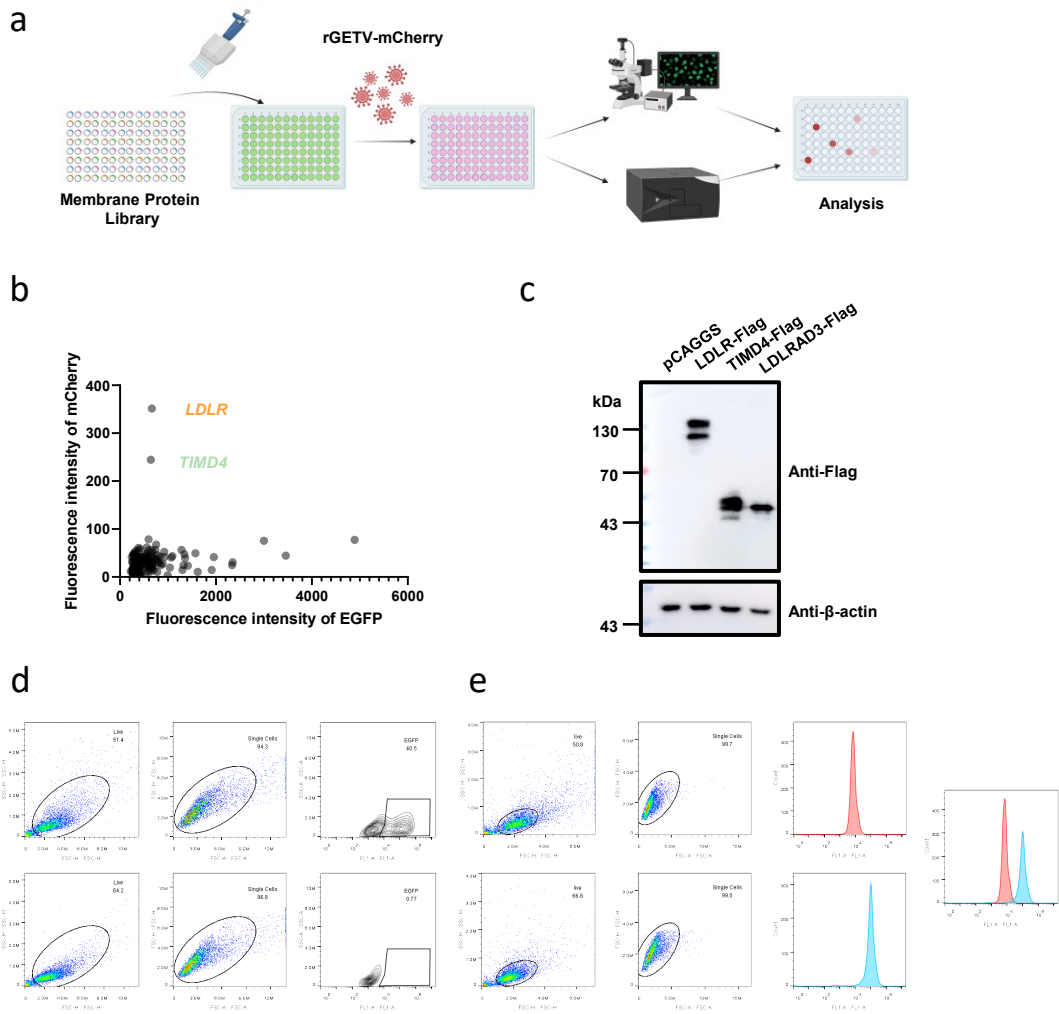

**Supplementary Fig. 2 Cell receptor screen identifies LDLR as a factor boosting infectivity of GETV.** **a**, Scheme of the overexpression-based screen. Plasmids encoding a small library of mouse membrane proteins and EGFP reporter were transfected into HEK 293T cells that were subsequently infected with rGETV-mCherry. The rGETV-mCherry infection (red fluorescence) and co-expressed EGFP with membrane proteins (green fluorescence) were imaged by an inverted fluorescence microscope; fluorescence intensities were measured using an automatic microplate reader. Figures were generated with BioRender software (<https://biorender.com/>) under the terms of a site license. **b**, Overall results of the overexpression library screen. The y-axis represents the red fluorescence intensity resulting from rGETV-mCherry infection. The x-axis shows the green fluorescence intensity from the expression of mouse membrane proteins. Each circle represents a single protein. The fluorescence intensity of mCherry or EGFP were measured at the excitation 587 nm and 395 nm respectively, and normalized to those of untransfected cells. **c**, Western blot analysis of LDLR, LDLRAD3 and TIMD4 expression (all flag-tagged) in HEK 293T cells. Anti-Flag antibody was used as the primary antibody for detection.  $\beta$ -actin was used as loading control. **d**, Examples showing flow cytometry gating strategy for the quantification of EGFP expressing cells upon rGETV-EGFP infection. HEK 293T control cells (bottom panels) and cells expressing LDLR (top panels) were infected with rGETV-EGFP. The percentage of cells falling within each gate is shown in the upper right corner. **e**, Flow cytometry gating strategy for receptor detection after immunostaining. HEK 293T control cells (top panels) and cells overexpressing LDLR (bottom panels) were stained with anti-FLAG primary antibody and an Alexa Fluor 488 conjugated goat anti-mouse IgG as a secondary antibody. Results from flow cytometry analysis were overlaid to show positive receptor expression (the example is from an experiment in Supplementary Fig. 4a). All the experiments were performed at least twice.

# Supplementary Fig. 3

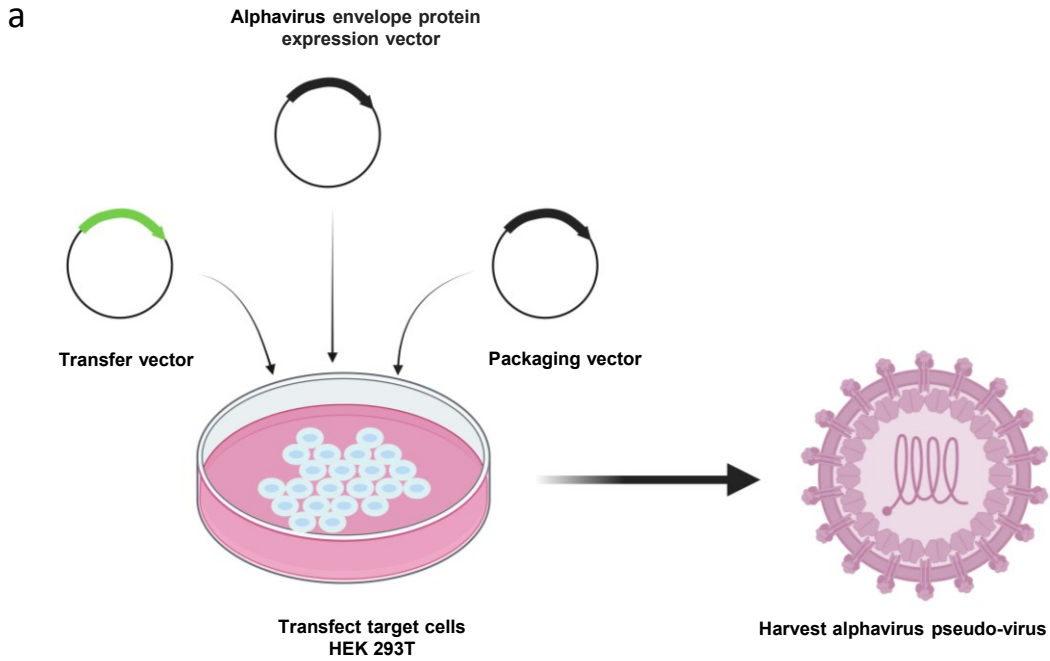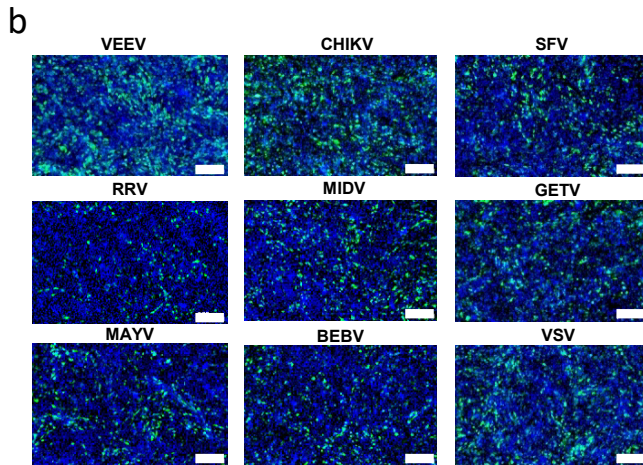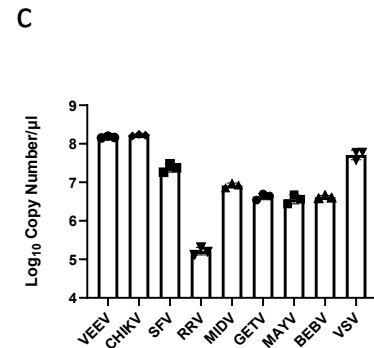

**Supplementary Fig. 3 Construction of lentivirus particles pseudotyped with glycoproteins of alphaviruses.** **a**, The scheme of pseudo-virus production. Region encoding for EGFP is shown with green arrow. Figures were created with BioRender software (<https://biorender.com/>) under the terms of a site license. **b**, Expression of EGFP in BHK-21 cells infected with pseudo-viruses harboring envelop proteins of viruses indicated above the panels. Cells were examined for the EGFP signal at 48 h post infection. Particles pseudotyped with G protein of VSV were used as control. Scale bar: 500 μm. **c**, Titers of obtained pseudo-viruses measured by qRT-PCR analysis. Primers detecting sequence encoding gag protein in the packaged lentivirus genomic RNA were used. Mean ± SD of three independent experiments are shown. Source data are provided as a Source Data file.

# Supplementary Fig. 4

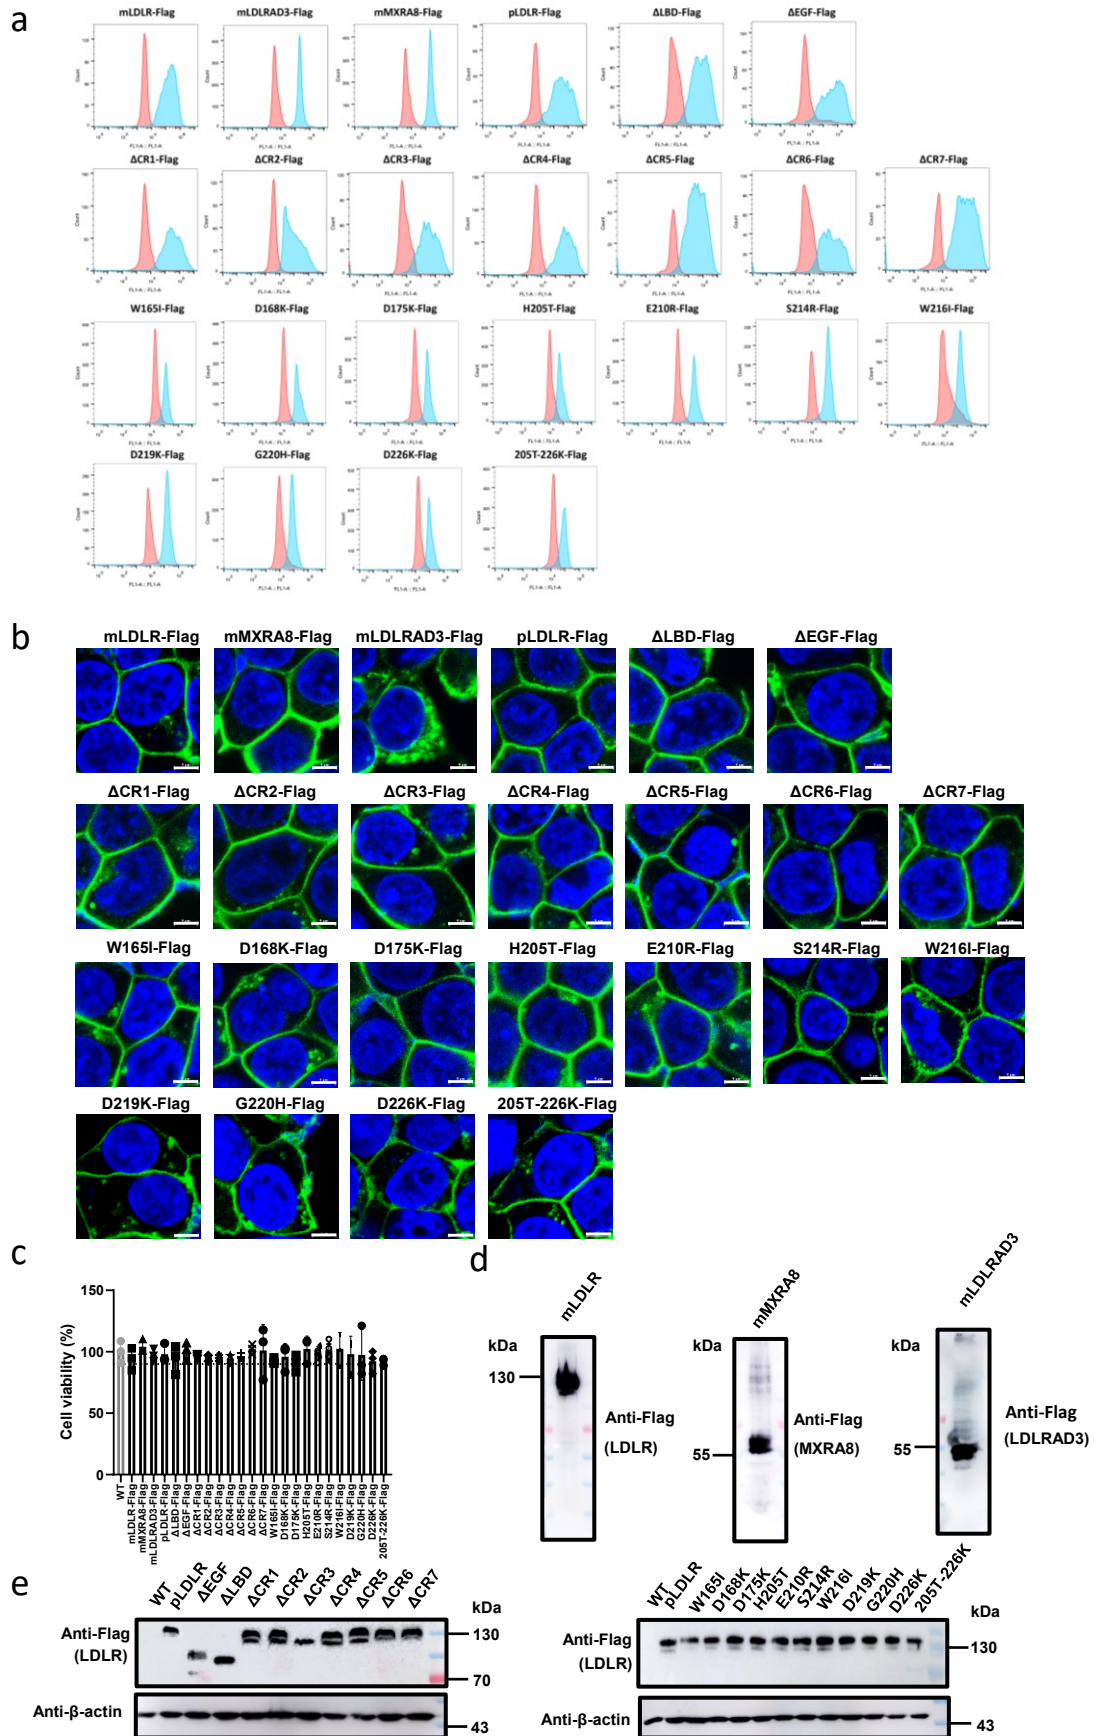

**Supplementary Fig. 4 Analysis of the expression of cell surface receptors.** **a**, Flow cytometry analysis of HEK 293T cells stably expressing indicated Flag-tagged proteins. Cells were stained with monoclonal anti-Flag M2 antibody (blue); isotype mouse IgG (pink) was used as a control. **b**, The localization of indicated Flag-tagged proteins in corresponding HEK 293T cell lines was detected by IFA. Proteins were detected using monoclonal anti-Flag M2 antibody (green), nuclei were counterstained with DAPI (blue). **c**, Viability of HEK 293T cell lines stably expressing indicated proteins was measured using Cell Counting Kit 8. Obtained values were normalized to these measured for parental HEK 293T cells (taken as 100%). Mean  $\pm$  SD of three independent experiments are shown. **d-e**, HEK 293T cells stably expressing the indicated Flag-tagged proteins were lysed and presence of recombinant proteins was analyzed by western blot using antibody against the Flag-tag; antibody against  $\beta$ -actin was used to detect a loading control. The experiment was performed twice with similar results. Molecular masses are indicated in kDa (**d-e**). Source data are provided as a Source Data file.

# Supplementary Fig. 5

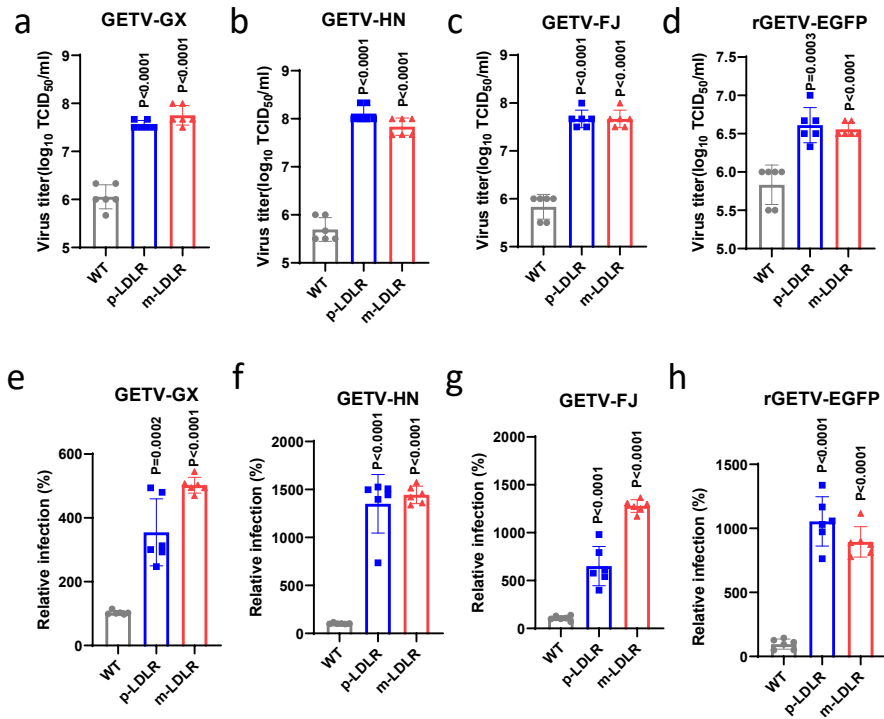

**Supplementary Fig. 5 Analysis of GETV infection in cells overexpressing LDLR from pig or hamster.** a-h, HEK 293T cells stably overexpressing LDLR from pig (p-LDLR) or hamster (m-LDLR) were infected with GETV-GX, GETV-HN, GETV-FJ or rGETV-EGFP (MOI=1). Virus titers in supernatants collected at 18 h post infection were determined on BHK-21 cells. WT: parental HEK 293T cells not expressing any exogenous LDLR (a-d). Infected cells were stained with anti-E2 mAb; the numbers of infected cells were determined by flow cytometry(e-h). Results are normalized relative to WT cells (e-h). Data are presented as mean values  $\pm$  SD (n= 3 independent experiments) and two-tailed p-values are calculated by unpaired Student's t test. Source data are provided as a Source Data file.

# Supplementary Fig. 6

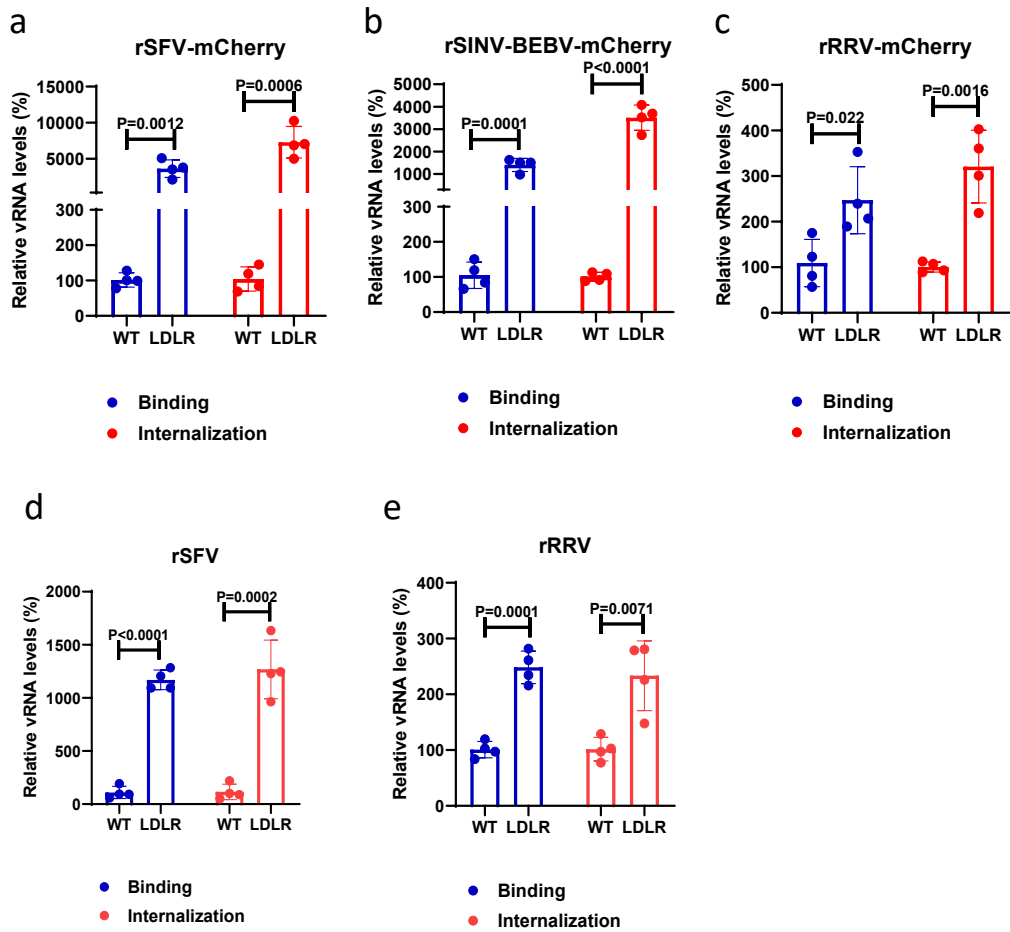

**Supplementary Fig. 6 Expression of LDLR promote the entry of the virus.** a-e, HEK 293T cells stably overexpressing LDLR from hamster were incubated with virions of rSFV-mCherry (a), rSINV-BEBV-mCherry (b), rRRV-mCherry (c), rSFV(d), or rRRV(e) at 4 °C for 30 min and harvested thereafter. Alternatively, after removing the unbound virus, cells were incubated further at 37° C for 1 h and harvested thereafter. vRNA levels were measured via qRT-PCR; data was normalized relative to WT cells. Mean ± SD of two independent experiments. Two-tailed p-values are calculated by unpaired Student's t test. Source data are provided as a Source Data file.

# Supplementary Fig. 7

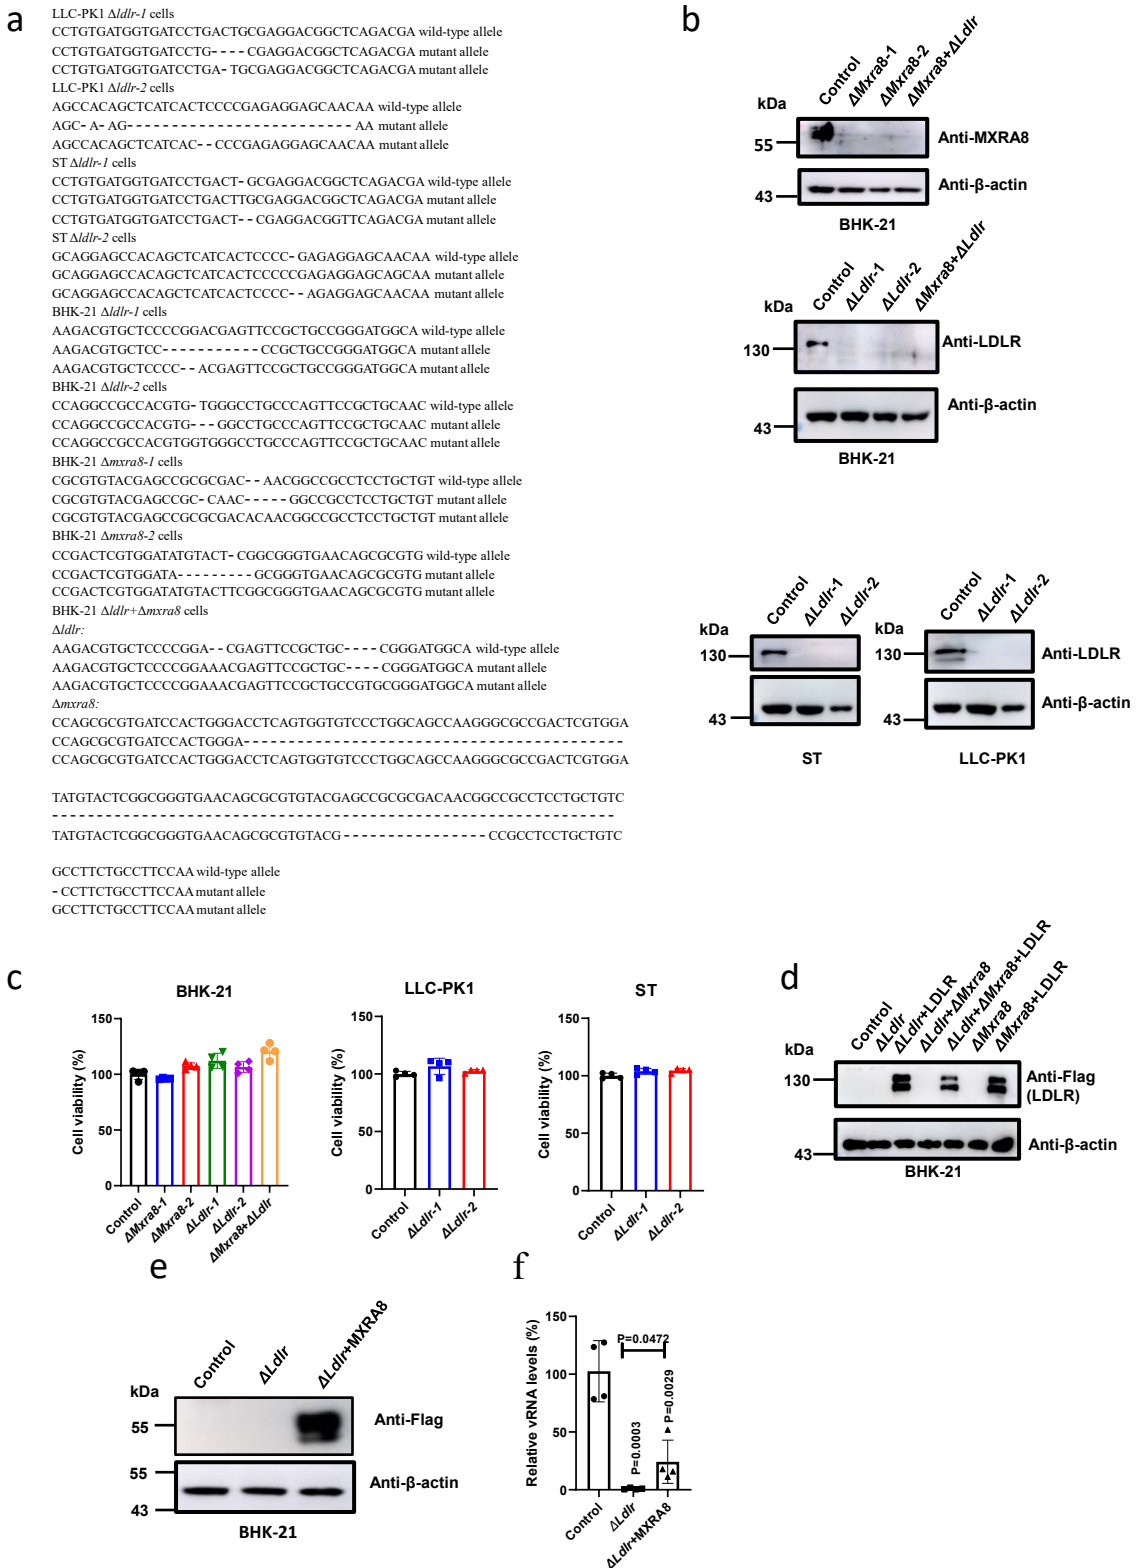

**Supplementary Fig. 7 Knock-out of LDLR and/or MXRA8 expression by CRISPR-Cas9 gene editing.** **a**, BHK-21, ST and LLC-PK1 cells were edited using a control or two different sgRNAs targeting *Ldlr* or *Mxra8*. Sanger sequencing was used to confirm successful *Ldlr* or *Mxra8* gene editing in obtained  $\Delta Mxra8$  BHK-21,  $\Delta Ldlr$  BHK-21,  $\Delta Mxra8+\Delta Ldlr$  BHK-21,  $\Delta LDLR$  ST and  $\Delta LDLR$  LLC-PK1 cell lines. **b**, western blot of lysates of parental (control) and  $\Delta Mxra8$  or  $\Delta Ldlr$  BHK-21, ST or LLC-PK1 cells. Expression on MXRA8 was detected using mouse polyclonal antibody and expression of LDLR was detected using rabbit monoclonal antibody. Antibody against beta-actin was used to detect the loading control. Representative images from two experiments are shown. **c**, Viability of parental BHK-21, LLC-PK1 and ST cells was compared to that of *Ldlr* or *Mxra8* gene knock-out cell lines by use of Cell Counting Kit 8. Data are mean  $\pm$  SD of four biological replicates. **d**, The  $\Delta Mxra8$ ,  $\Delta Ldlr$  or  $\Delta Mxra8+\Delta Ldlr$  BHK-21 cells were transiently transfected with expression plasmid for LDLR-Flag and expression of the protein was analyzed by western blot using monoclonal anti-Flag M2 antibody. Antibody against beta-actin was used to detect the loading control. **e**, **f**,  $\Delta Ldlr$  BHK-21 cells were transfected with expression plasmid of MXRA8 or were mock-transfected. Cells were then infected with rGETV-EGFP (MOI=0.001). At 18 h post infection, copy numbers of virus genomes inside the cells were determined by qRT-PCR. Expression of tagged MXRA8 was verified using western blot analysis. Results are normalized relative to WT BHK-21 cells. Two-tailed p-values are calculated by unpaired Student's t test. The experiment was performed twice with similar results. Molecular masses are indicated in kDa (b, d, e). Source data are provided as a Source Data file.



# Supplementary Fig. 8

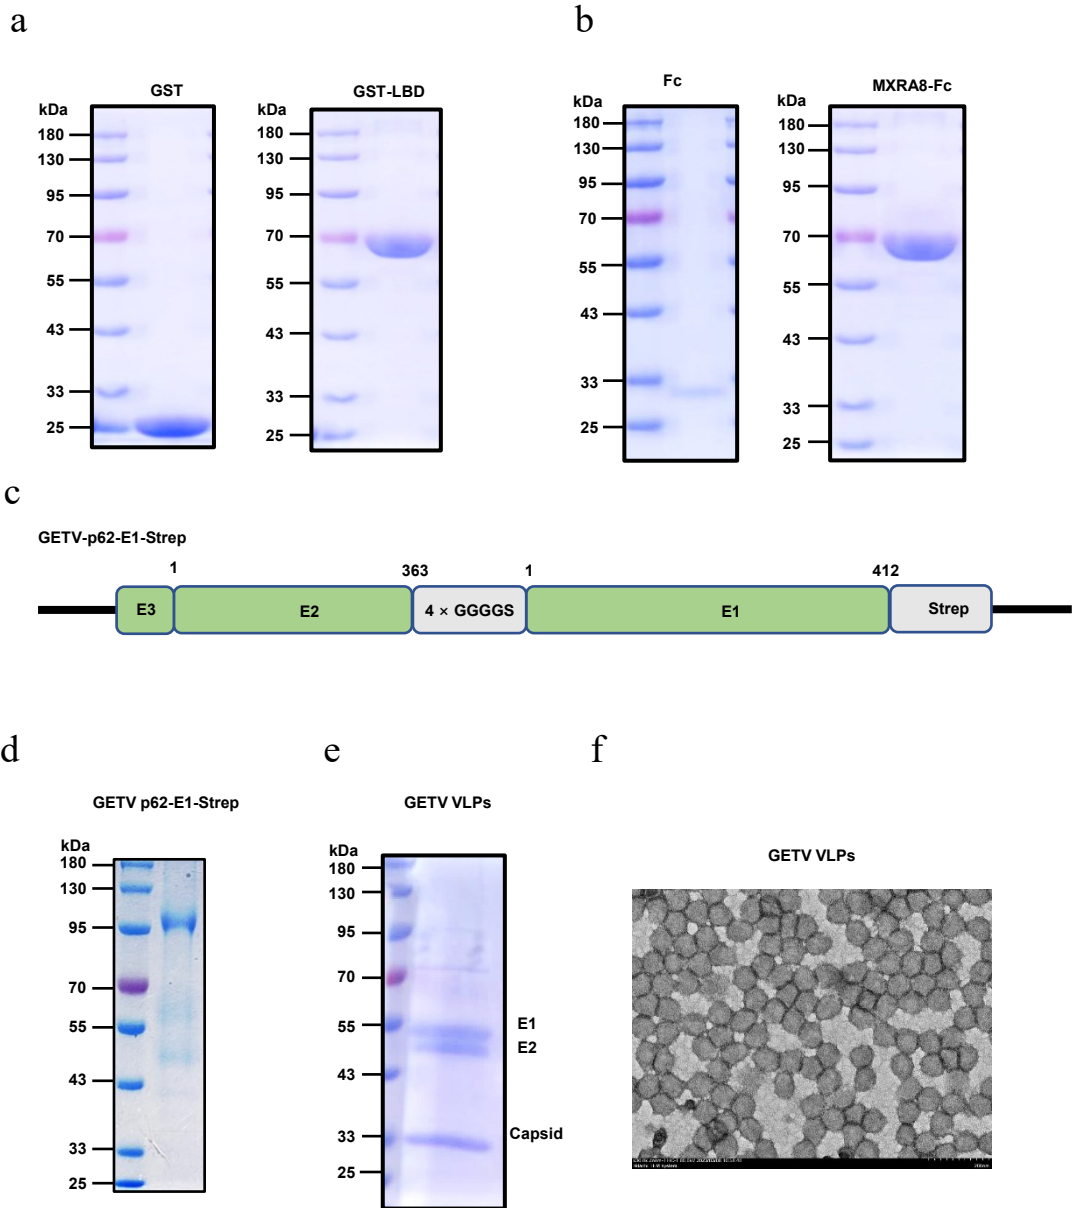

**Supplementary Fig. 8 Analysis of purified recombinant proteins and VLPs preparations.** a-b, Purified GST or GST-LBD fusion proteins (a), Fc or MXRA8-Fc fusion proteins (b) were separated using SDS-PAGE and detected by Coomassie blue staining. c, Schematic presentation of WT GETV structural polyprotein and expressed GETV p62-E1-Strep protein. TM, transmembrane domain; Strep, streptavidin binding tag. d, Purified GETV-p62-E1-strep polyprotein analyzed using SDS-PAGE and detected by Coomassie blue staining. e, Proteins present in purified VLPs of GETV were separated using SDS-PAGE and detected by Coomassie blue staining. f, Electron micrographs of negatively stained purified VLPs of GETV. Scale bar is 200 nm. The experiment was performed twice, and representative micrographs are shown. The experiment was performed twice with similar results. Molecular masses are indicated in kDa (a-b, d-e). Source data are provided as a Source Data file.

# Supplementary Fig. 9

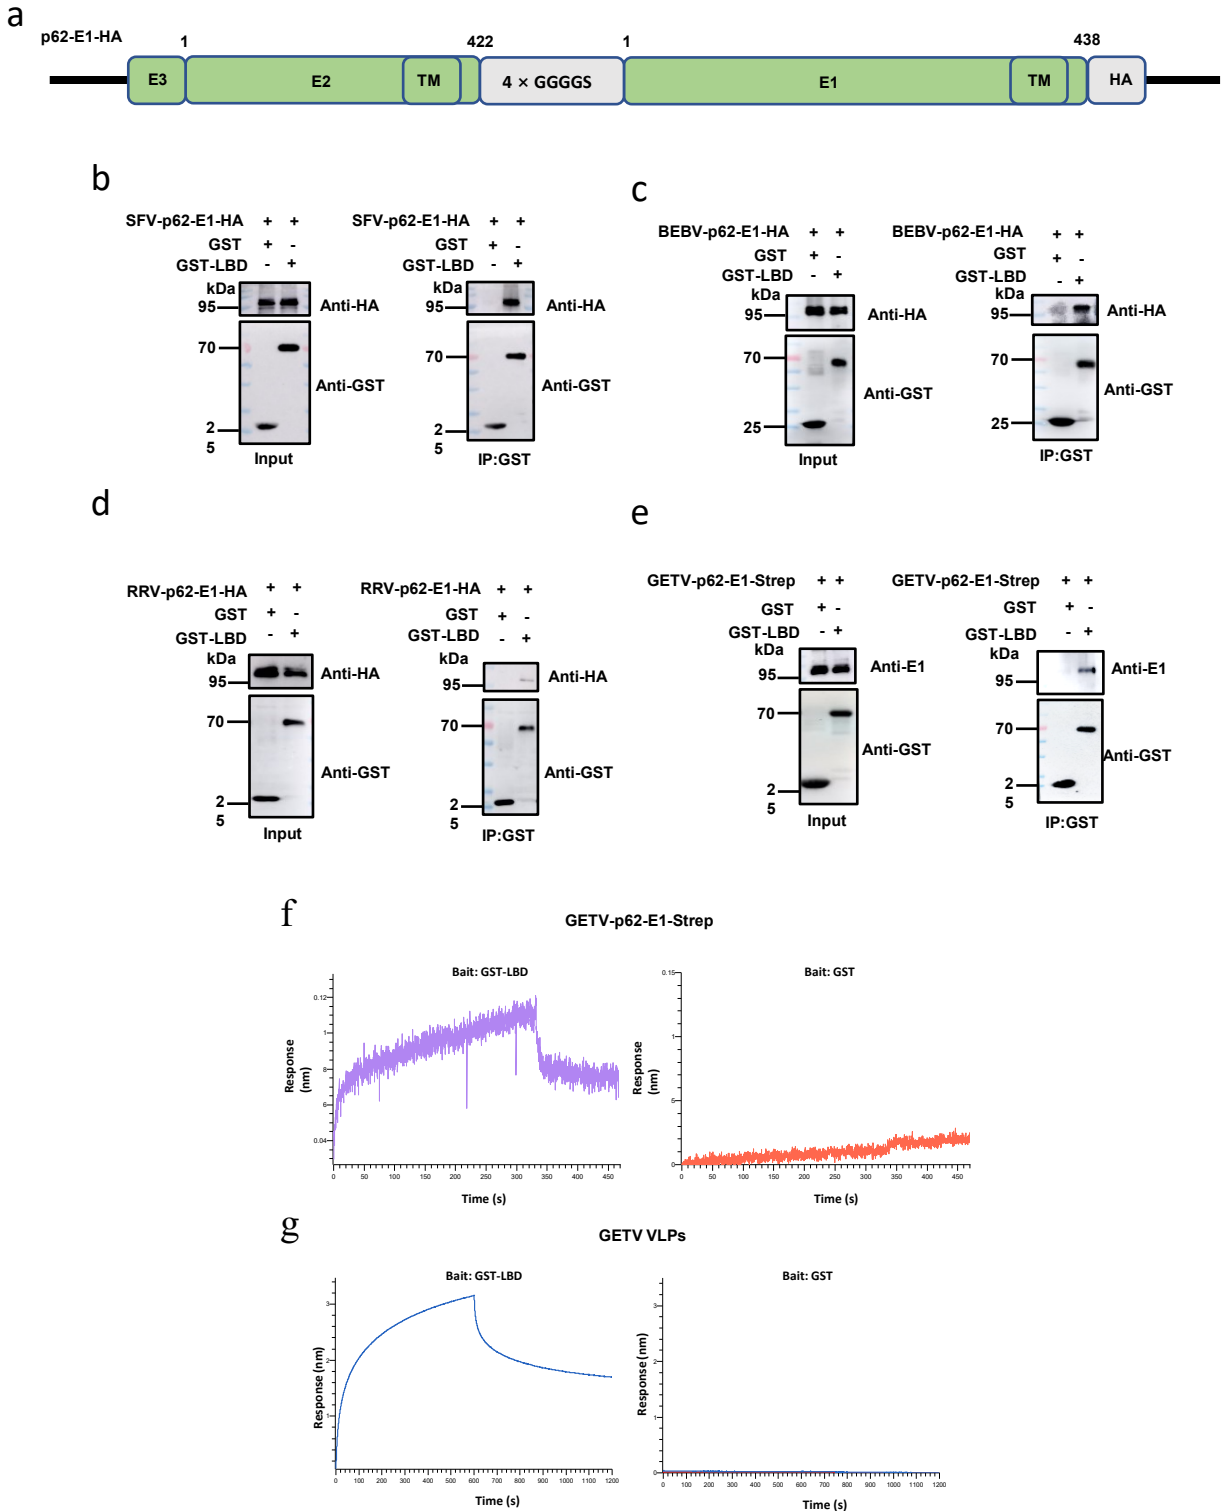

**Supplementary Fig. 9 Demonstration of interaction between alphavirus E proteins or VLPs and GST-LBD protein.** a, Scheme of the construct of p62-E1-HA plasmid. TM: transmembrane region. b-d, HA-tagged p62-E1 of SFV(b), BEBV(c) or RRV(d) was incubated with GST or GST-LBD and subsequently subjected to immunoprecipitation with anti-GST antibody. Proteins were detected using western blot analysis performed using antibodies against GST and HA tag. e, Purified GETV p62-E1-strep was incubated with GST or GST-LBD and subsequently subjected to immunoprecipitation with anti-GST antibody. Proteins were detected using western blot analysis performed using antibodies against GST and E1. f, Representative images of biolayer interferometry binding assay with the binding and dissociation parameters of GST-LBD and GST to GETV-p62-E1-strep. A 1:1 binding model was used to fit the experimental curves. g, Representative images of biolayer interferometry binding assay with the binding and dissociation parameters of GST-LBD and GST to GETV VLPs. A 1:1 binding model was used to fit the experimental curves. The experiment was performed twice with similar results. Molecular masses are indicated in kDa (b-e). Source data are provided as a Source Data file.

# Supplementary Fig. 10

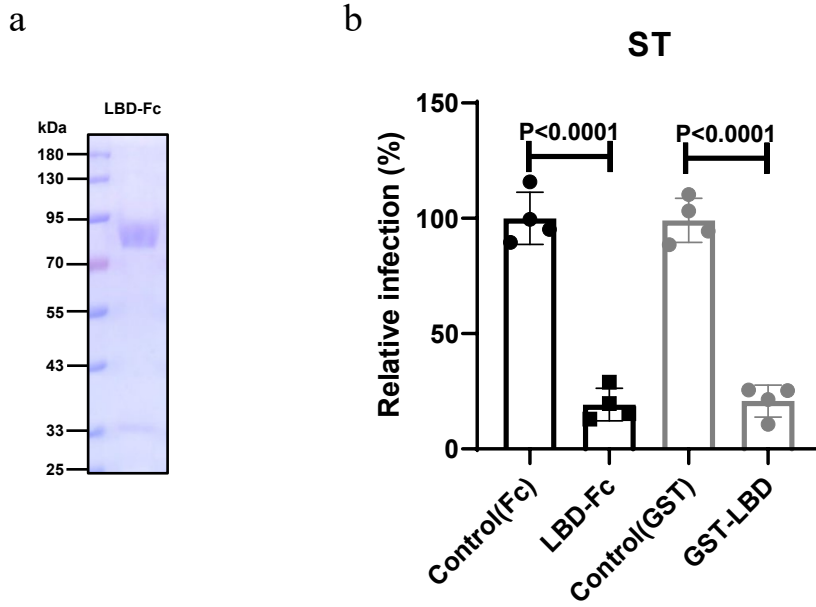

**Supplementary Fig. 10 The LBD-Fc or GST-LBD fusion proteins block GETV infection.** **a**, Purified LBD-Fc fusion protein analyzed using SDS-PAGE and detected by Coomassie blue staining. **b**, Virions of rGETV-EGFP were pre-incubated with LBD-Fc, Fc, GST-LBD or GST proteins taken at concentration  $1 \mu\text{g ml}^{-1}$  and used to infect ST cells. At 18 h post infection number of infected cells was measured by flow cytometry. Results are normalized relative to control. Mean  $\pm$  SD of two independent experiments. Two-tailed p-values are calculated by unpaired Student's t test. The experiment was performed twice with similar results. Molecular masses are indicated in kDa (**a**). Source data are provided as a Source Data file.

# Supplementary Fig. 11

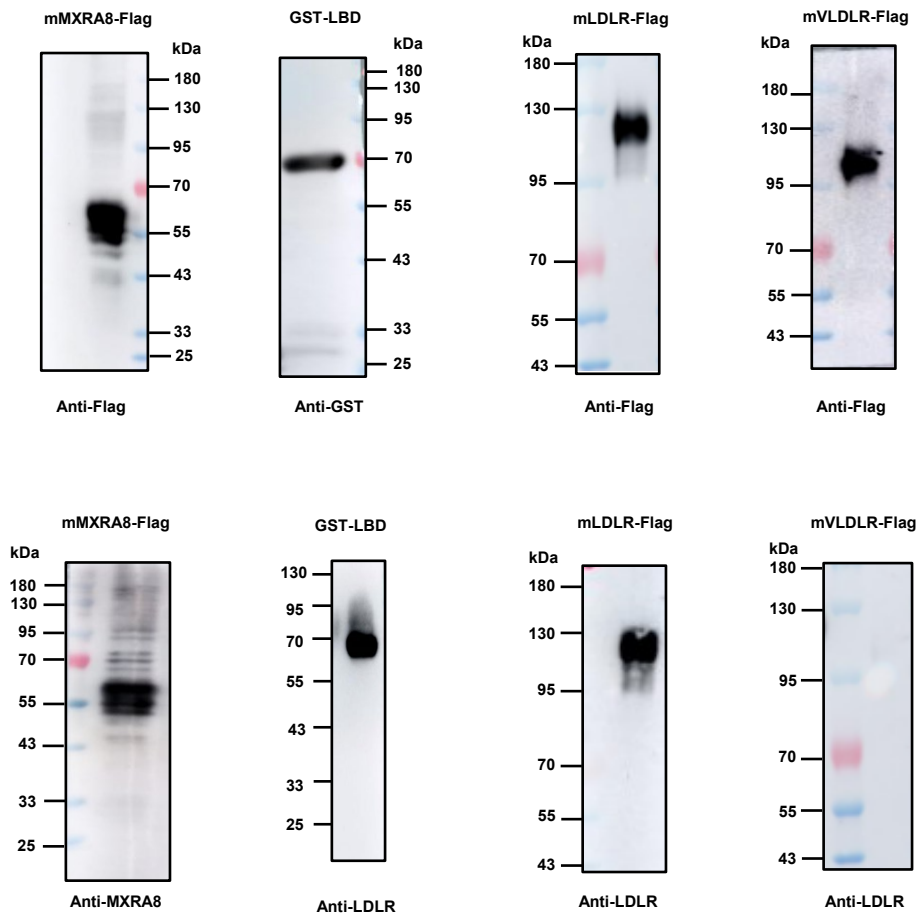

**Supplementary Fig. 11 Antibody validation.** Recombinant mMXRA8-Flag, GST-LBD, mLDLR-Flag and mVLDLR-Flag analyzed by western blot performed using antibodies to Flag-tag, GST, LDLR or MXRA8 as primary antibodies. The experiment was performed twice with similar results. Molecular masses are indicated in kDa. Source data are provided as a Source Data file.

# Supplementary Fig. 12

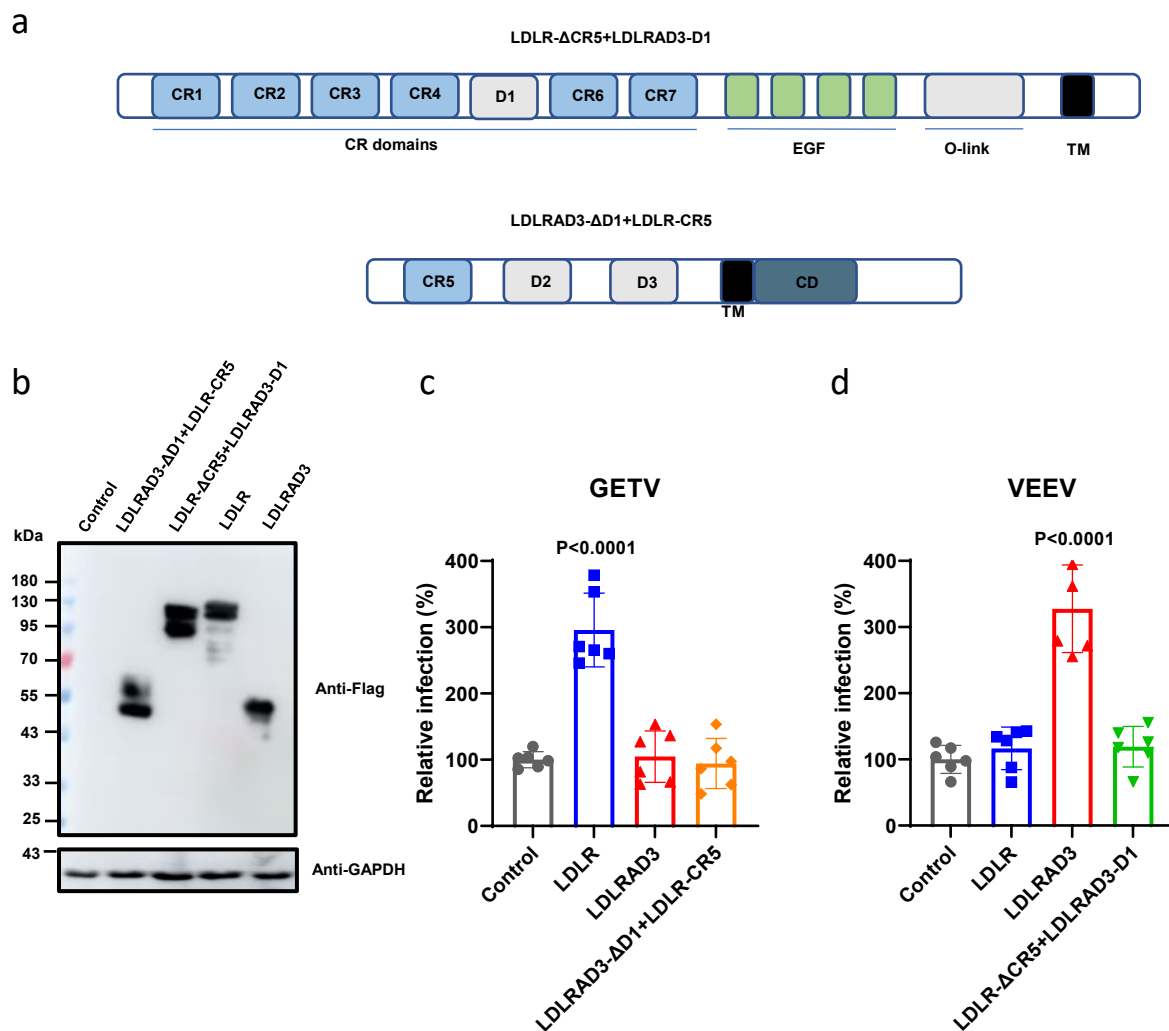

**Supplementary Fig. 12 LDLR and LDLRAD3 chimeric proteins do not promoter infection with pseudo-virions GETV or VEEV.** **a**, A schematic diagram describing how the LDLR- $\Delta$ CR5+LDLRAD3-D1 construct was designed. CD: cytoplasmic domain; TM: transmembrane region. **b**, HEK 293T cells were transiently transfected with plasmids encoding LDLRAD3- $\Delta$ D1+LDLR-CR5, LDLR- $\Delta$ CR5+LDLRAD3-D1, LDLRAD3 or LDLR. Expression of recombinant proteins was detected by western blot analysis using monoclonal anti-Flag M2 antibody, anti-GAPDH antibody was used to detect loading control. **c**, **d**, The efficiency of infection of HEK-293T cells, transiently transfected with expression constructs of indicated proteins, using GETV and VEEV pseudo-viruses was measured by detection of EGFP positive cells by flow cytometry. Results are normalized relative to control. Mean  $\pm$  SD of three independent experiments performed in duplicates are shown. Two-tailed p-values are calculated by unpaired Student's t test. The experiment was performed twice with similar results. Molecular masses are indicated in kDa (**b**). Source data are provided as a Source Data file.

# Supplementary Fig. 13

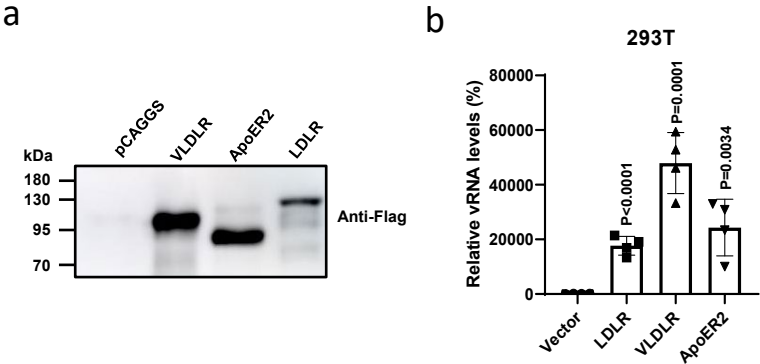

**Supplementary Fig. 13 The effects of LDLR, VLDLR or ApoER2 on GETV.** **a**, HEK 293T cells were transfected with empty pCAGGS vector or with expression plasmids for hamster LDLR, VLDLR, and ApoER2. western blot was made using anti-Flag antibody. **b**, HEK 293T cells expressing hamster LDLR, VLDLR or ApoER2 or transfected with pCAGGS vector (negative control) were infected with the GETV-HN. At 12 h post infection viral RNA (vRNA) levels in infected cells were measured via qRT-PCR. vRNA levels in control cells were taken as 100%. Mean  $\pm$  SD of two independent experiments. Two-tailed p-values are calculated by unpaired Student's t test. The experiment was performed twice with similar results. Molecular masses are indicated in kDa (**a**). Source data are provided as a Source Data file.

# Supplementary Fig. 14

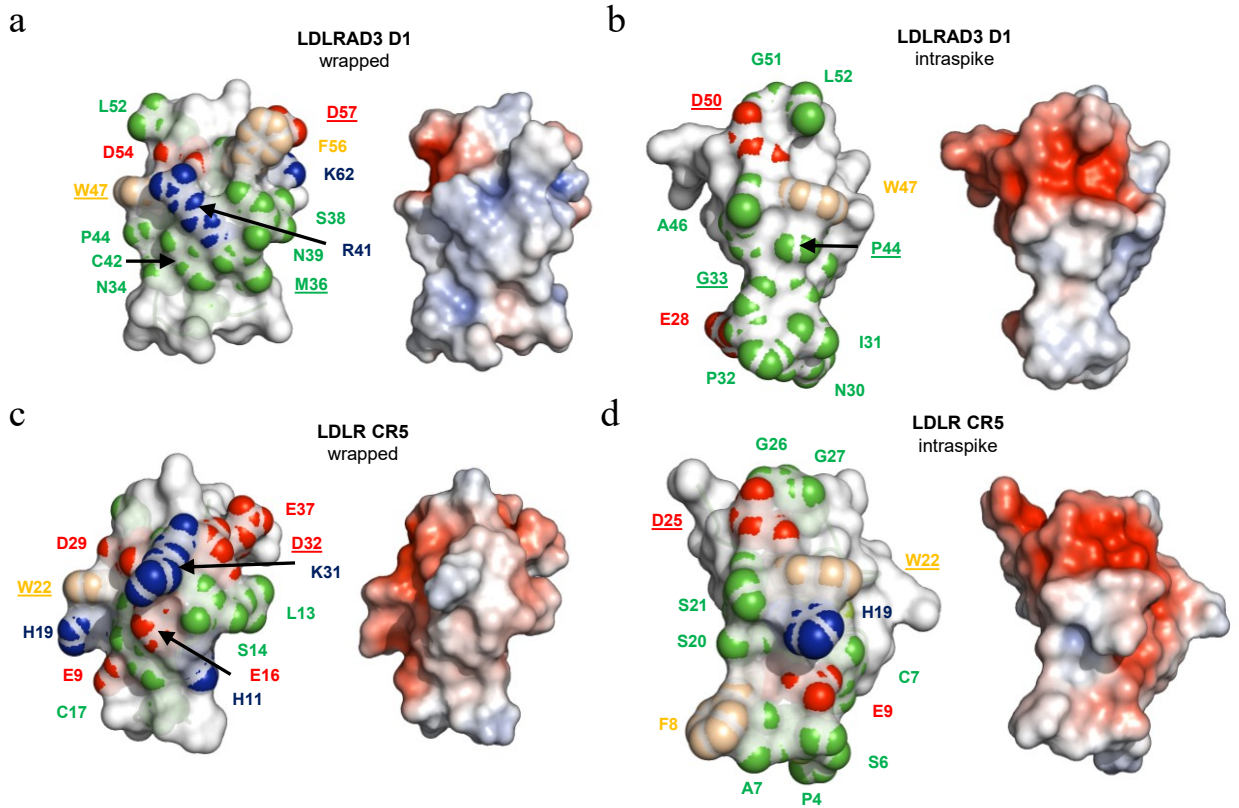

**Supplementary Fig. 14 Comparison of the molecular surfaces of D1 of LDLRAD3 and CR5 of LDLR. a-b,** Surface representation of D1 of LDLRAD3 showing the amino acid involved in binding to E1/E2 of VEEV as spheres. **a,** Wrapped form, donates contacts to the wrapped E2-E1 heterodimer **b,** Intraspine form, intraspine refers to the intraspine E2-E1 heterodimer. **c-d,** Surface representation of CR5 of LDLR showing the amino acid located at equivalent positions as residues shown in **a** and **b** that important for binding of D1 of LDLRAD3 to E1-E2 of VEEV. Positively charged residues are coloured blue, negatively charged red, aromatic residues in wheat and other amino acids in green. The right part of each figure shows the electrostatic surface potential of the same view of the structure, color-coded from red (acidic) to blue (basic). The deep red in the upper part of both structures corresponds to the acidic residues that coordinate the calcium ion.

# Supplementary Fig. 15

a

## Clustal Omega CR4 alignment

|          |     |                                                                      |
|----------|-----|----------------------------------------------------------------------|
| Human    | CR4 | TCGPAS-FQCNSSSTCIPQL <b>W</b> ACDNDPDC <b>E</b> DGSDEWPQRCRG         |
| Mouse    | CR4 | TCGPAH-FRCNSSICIPSL <b>W</b> ACDGDVDCV <b>D</b> GSDWEPQNCQG          |
| Rabbit   | CR4 | TCGPAH-FRCNSSSCVPAL <b>W</b> ACDGEPCD <b>D</b> GSDWEPARCQA           |
| Horse    | CR4 | TCGPAS-FQCNSSACIPEL <b>W</b> ACDGDPCD <b>K</b> DGSDWEPQRCQA          |
| Pig      | CR4 | TCGPAS-FQCNSSSTCIP <b>E</b> L <b>W</b> ACDGDPC <b>E</b> DGSDWEPQHCRS |
| Cattle   | CR4 | TCGPAN-FQCNSSMCIPQL <b>W</b> ACDGDPCD <b>D</b> GSDWEPKHCQT           |
| Goat     | CR4 | TCGPAN-FQCNSSMCIPQL <b>W</b> ACD <b>D</b> DPDCD <b>D</b> GSDWEPKHCQS |
| Mosquito | CR4 | TCDPLKQFACSENYCITS <b>K</b> WRC <b>D</b> GEPC <b>D</b> PGSDERGCTNPT  |

\*\*\*\*\* \*:\*\*\*\*\*\* \*: \* \*\*\*\*\* : \* \*\* \*\*\*\*\* \*

## Clustal Omega CR5 alignment

|          |     |                                                                                                                           |
|----------|-----|---------------------------------------------------------------------------------------------------------------------------|
| Human    | CR5 | SSPCSAFEF <b>H</b> CLS- <b>G</b> ECI <b>H</b> SS <b>W</b> RC <b>D</b> GGPD <b>C</b> K <b>D</b> KSDEENCAV                  |
| Mouse    | CR5 | SSPCSSLEF <b>H</b> CGS- <b>S</b> ECI <b>H</b> RS <b>W</b> VC <b>D</b> GEAD <b>C</b> K <b>D</b> KSDE-ECAV                  |
| Rabbit   | CR5 | RGPCSRHEF <b>H</b> CGS- <b>G</b> ECV <b>H</b> AS <b>W</b> RC <b>D</b> GDAD <b>C</b> R <b>D</b> GSDERDCAA                  |
| Horse    | CR5 | DSPCSALEF <b>H</b> CSS- <b>G</b> ECV <b>H</b> SS <b>W</b> RC <b>D</b> GDPC <b>R</b> D <b>K</b> SDENCAV                    |
| Pig      | CR5 | NNPCSALEF <b>H</b> CHS- <b>G</b> ECI <b>H</b> SS <b>W</b> RC <b>D</b> GDT <b>D</b> C <b>K</b> D <b>K</b> SDENCDV          |
| Cattle   | CR5 | NNPCSALEF <b>H</b> CGS- <b>G</b> ECI <b>H</b> SS <b>W</b> H <b>C</b> D <b>H</b> DP <b>D</b> C <b>K</b> D <b>K</b> SDENCAV |
| Goat     | CR5 | DNPCSALEF <b>H</b> CGS- <b>G</b> ECI <b>H</b> SS <b>W</b> RC <b>D</b> RD <b>P</b> D <b>C</b> K <b>D</b> KSDEENCAV         |
| Mosquito | CR5 | VNPCLSLEYQCSDRITCI <b>H</b> KS <b>W</b> IC <b>D</b> GE <b>K</b> DC <b>P</b> D <b>G</b> DEMPPI <b>C</b>                    |

.\*\*\* \*\*\*\*\* \* .\*\*:\* \*\* \*\* \*\* \*\* \*\* \*\* \*\* \*\* \*\* \*\* \*\* \*\* \*\* \*\* \*\* \*\* \*\* \*\* \*\* \*\* \*\* \*\* \*\* \*\* \*\* \*\* \*\* \*\* \*\* \*\*

b

RMSD = 1.291 (30 to 30 atoms)

RMSD = 1.362 (32 atoms)

Cr2 CKSGDFSCGGRV**R**CIPQ**F**W**R**CD**G**QVDCD**N**GSDEQGC  
|.:.:|. | .....|.....|.....|.....|.:.:|.:|  
Cr5 CSAFEF**H**CC--LS**G**ECI**H**SS**W**RC**D**GGPD**C**K**D**KSDEENC

Cr5 CSAFEF**H**CLS**G**ECI**H**SS**W**RC**D**GGPD**C**K**D**KSDEENC  
|.....|.....|.....|.....|.:|.....|.....|.....|.....|  
Cr6 CRPDEFQCS**D**GN**C**I**H**GS**R**Q**C**D**R**EYD**C**K**D**LSDEVGC

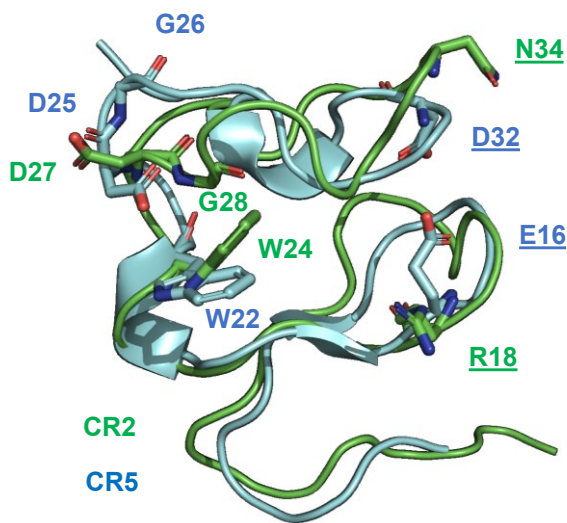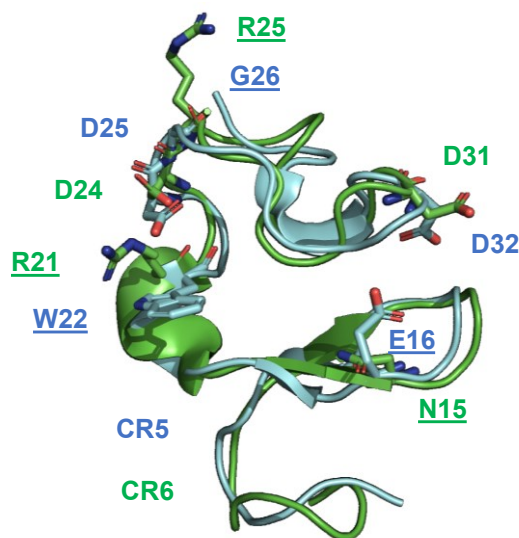

**Supplementary Fig. 15 Conservation of amino acids important for binding of GETV to the CR5 domain.** a, Alignment of sequences of the CR4 and CR5 domains of LDLR of human, mouse, mosquito and farm animals susceptible to GETV infection. The amino acids sequences of the CR4 and CR5 domains of the LDLR receptor from human (NP\_000518.1), mouse (NP\_034830.2), rabbit (XP\_051693990.1), horse (XP\_005611994.2), pig (NP\_001193283.1), cattle (NP\_001160002.1), goat (XP\_005682432.1) and Mosquito (AAQ16410.1) were aligned using Clustal Omega server (<https://www.ebi.ac.uk/Tools/msa/clustalo/>). Amino acids residues, replacement of which led to the strongest reduction of ability to promote the cell entry of GETV, are in red, those with a lower impact are in blue and these for which no detectable effect was revealed are in bold. The amino acids residues coordinating the binding of Ca<sup>2+</sup>-ion are highlighted in grey. The six cysteine residues forming three disulfide-linkages are also completely conserved. b, Conservation of amino acids important for binding of GETV to the CR5 domain in CR2 and CR6. The 3D-structures of CR5 (PDB: 1AJJ) and CR2 (1LDR) and CR6 (1D2J) were aligned and the amino acids important in CR5 for binding to GETV or the corresponding amino acids in CR2 and CR6 are highlighted as sticks. The two and three non-conservative substitutions are underlined. The upper part shows a pairwise alignment of the sequences using emboss water ([https://www.ebi.ac.uk/Tools/psa/emboss\\_water/](https://www.ebi.ac.uk/Tools/psa/emboss_water/))



Supplementary Table 1 Membrane protein library information

|    | Gene     | Red fluorescence intensity | Green fluorescence intensity |
|----|----------|----------------------------|------------------------------|
| 1  | ANXA7    | 47                         | 1341                         |
| 2  | BCL2L13  | 77                         | 4891                         |
| 3  | CXCL9    | 42                         | 832                          |
| 4  | FNDC5    | 42                         | 502                          |
| 5  | CD38     | 41                         | 654                          |
| 6  | HMOX1    | 44                         | 654                          |
| 7  | IGF1R    | 19                         | 682                          |
| 8  | PPP3CB   | 30                         | 675                          |
| 9  | SLC1A2   | 49                         | 1571                         |
| 10 | RAB35    | 18                         | 658                          |
| 11 | ASGR1    | 34                         | 541                          |
| 12 | CDC42    | 51                         | 673                          |
| 13 | CAMK2A   | 54                         | 327                          |
| 14 | FAS      | 29                         | 313                          |
| 15 | NFE212   | 32                         | 381                          |
| 16 | HSPA5    | 56                         | 735                          |
| 17 | IFNGR1   | 23                         | 1413                         |
| 18 | PTEN     | 34                         | 527                          |
| 19 | SLC12A5  | 30                         | 587                          |
| 20 | LDLR     | 351                        | 662                          |
| 21 | ACSL1    | 67                         | 752                          |
| 22 | CLEC1A   | 44                         | 327                          |
| 23 | CYLD     | 44                         | 3455                         |
| 24 | FOLH1    | 24                         | 1323                         |
| 25 | GIT1     | 37                         | 586                          |
| 26 | HCK      | 41                         | 1955                         |
| 27 | JAG1     | 21                         | 658                          |
| 28 | P2RX2    | 19                         | 1039                         |
| 29 | SCAMP5   | 28                         | 819                          |
| 30 | TIMD4    | 244                        | 641                          |
| 31 | ADSSL1   | 75                         | 2999                         |
| 32 | CRTC1    | 41                         | 926                          |
| 33 | CHD1     | 26                         | 668                          |
| 34 | FGFR4    | 16                         | 620                          |
| 35 | PDCD1    | 28                         | 671                          |
| 36 | HSP90B1  | 14                         | 1300                         |
| 37 | LRP3     | 10                         | 590                          |
| 38 | P2RY14   | 8                          | 515                          |
| 39 | SERPINE2 | 21                         | 507                          |
| 40 | APOE     | 47                         | 528                          |
| 41 | CACNA2D2 | 40                         | 350                          |
| 42 | DLL1     | 9                          | 338                          |
| 43 | FBXW7    | 26                         | 559                          |
| 44 | GNAI3    | 23                         | 643                          |
| 45 | HPSE     | 46                         | 274                          |
| 46 | LAMP2    | 11                         | 640                          |
| 47 | PITPNA   | 55                         | 588                          |
| 48 | SIGMAR   | 1                          | 661                          |
| 49 | ATG14    | 45                         | 775                          |
| 50 | CTNNB1   | 41                         | 420                          |

|     | Gene     | Red fluorescence intensity | Green fluorescence intensity |
|-----|----------|----------------------------|------------------------------|
| 51  | EPHB2    | 6                          | 373                          |
| 52  | CNTNAP4  | 25                         | 302                          |
| 53  | HCN2     | 15                         | 393                          |
| 54  | GORASP1  | 34                         | 390                          |
| 55  | LGALS3BP | 21                         | 405                          |
| 56  | PML      | 40                         | 1068                         |
| 57  | TH       | 24                         | 855                          |
| 58  | AKAP5    | 52                         | 921                          |
| 59  | CXADR    | 33                         | 520                          |
| 60  | EFR3A    | 32                         | 407                          |
| 61  | SIRT2    | 27                         | 586                          |
| 62  | AGER     | 47                         | 559                          |
| 63  | SREBF2   | 34                         | 350                          |
| 64  | PTPN6    | 43                         | 562                          |
| 65  | P4HB     | 39                         | 1356                         |
| 66  | TRPA1    | 30                         | 791                          |
| 67  | ARC      | 78                         | 594                          |
| 68  | CTNND1   | 27                         | 888                          |
| 69  | EPHB4    | 20                         | 614                          |
| 70  | GSDMD    | 56                         | 1282                         |
| 71  | PHB2     | 56                         | 656                          |
| 72  | HOMER1   | 38                         | 701                          |
| 73  | PIK3R3   | 10                         | 773                          |
| 74  | SOX10    | 3                          | 994                          |
| 75  | TNFRSF1A | 37                         | 778                          |
| 76  | ARRB2    | 36                         | 752                          |
| 77  | CD36     | 47                         | 284                          |
| 78  | CD209D   | 42                         | 278                          |
| 79  | ICOSL    | 48                         | 281                          |
| 80  | MAS1     | 42                         | 243                          |
| 81  | NUMB     | 35                         | 324                          |
| 82  | RAB7     | 42                         | 310                          |
| 83  | SOCS1    | 43                         | 361                          |
| 84  | SLC40A1  | 23                         | 333                          |
| 85  | XBP1     | 61                         | 383                          |
| 86  | APLNR    | 32                         | 365                          |
| 87  | CCR8     | 32                         | 248                          |
| 88  | DLG2     | 32                         | 274                          |
| 89  | IFNG     | 41                         | 464                          |
| 90  | MAPK1    | 24                         | 313                          |
| 91  | OLFR168  | 32                         | 366                          |
| 92  | RAB5B    | 43                         | 317                          |
| 93  | SOCS3    | 38                         | 519                          |
| 94  | TM4SF19  | 38                         | 526                          |
| 95  | ZHX2     | 42                         | 385                          |
| 96  | ACKR4    | 24                         | 421                          |
| 97  | CX3CR1   | 21                         | 283                          |
| 98  | FAP      | 25                         | 307                          |
| 99  | ITGB1    | 11                         | 401                          |
| 100 | MRGPRD   | 1                          | 265                          |

|     | Gene    | Red fluorescence intensity | Green fluorescence intensity |
|-----|---------|----------------------------|------------------------------|
| 101 | OSCP1   | 15                         | 706                          |
| 102 | RNF217  | 12                         | 222                          |
| 103 | SCARB1  | 20                         | 296                          |
| 104 | TSPO    | 11                         | 1619                         |
| 105 | APOO    | 27                         | 323                          |
| 106 | CD209B  | 24                         | 409                          |
| 107 | GJB1    | 24                         | 578                          |
| 108 | ITGA4   | 6                          | 306                          |
| 109 | MTDH    | 12                         | 293                          |
| 110 | ORA1    | 4                          | 375                          |
| 111 | SDC1    | 20                         | 263                          |
| 112 | SPINK5  | 31                         | 2347                         |
| 113 | TLR8    | 14                         | 256                          |
| 114 | ANXA5   | 41                         | 385                          |
| 115 | CLSTN1  | 30                         | 448                          |
| 116 | GRM5    | 16                         | 320                          |
| 117 | KCNJ11  | 14                         | 343                          |
| 118 | MAPK3   | 12                         | 460                          |
| 119 | PTGS2   | 7                          | 265                          |
| 120 | SEMA3E  | 9                          | 277                          |
| 121 | SLC19A2 | 12                         | 269                          |
| 122 | TNFRSF4 | 8                          | 309                          |
| 123 | AP4M1   | 62                         | 557                          |
| 124 | CHL1    | 25                         | 552                          |
| 125 | GRIN2A  | 5                          | 428                          |
| 126 | KCNN4   | 9                          | 266                          |
| 127 | MYSM1   | 7                          | 272                          |
| 128 | PCSK9   | 24                         | 298                          |
| 129 | SMURF1  | 9                          | 287                          |
| 130 | SPARC   | 24                         | 374                          |
| 131 | VTCN1   | 7                          | 320                          |
| 132 | BCL3    | 10                         | 297                          |
| 133 | CD200   | 23                         | 400                          |
| 134 | GPBAR1  | 12                         | 261                          |
| 135 | LGR4    | 17                         | 278                          |
| 136 | NCAM1   | 16                         | 293                          |
| 137 | PRKCG   | 26                         | 331                          |
| 138 | SHH     | 35                         | 322                          |
| 139 | SLC17A8 | 21                         | 321                          |
| 140 | VDAC1   | 7                          | 322                          |
| 141 | CD47    | 59                         | 414                          |
| 142 | CXCR4   | 55                         | 389                          |
| 143 | HPCAL1  | 25                         | 2336                         |
| 144 | LGALS3  | 15                         | 1910                         |
| 145 | NOS1AP  | 6                          | 418                          |
| 146 | PLG     | 31                         | 272                          |
| 147 | SYT1    | 42                         | 598                          |
| 148 | SLC6A6  | 51                         | 301                          |
| 149 | WNT7B   | 26                         | 347                          |
| 150 | LDLRAD3 | 43                         | 1090                         |

Supplementary Table 2 ELISA reactivity of mouse anti-LDLR or anti-MXRA8 polyclonal antibodies (pAbs) against GST-LBD or MXRA8-Fc

| Serum dilution ratio | Isotype | Anti-LDLR | Anti-MXRA8 |
|----------------------|---------|-----------|------------|
| 10 <sup>-1</sup>     | 0.2316  | 3.0249    | 3.247      |
| 10 <sup>-2</sup>     | 0.3671  | 2.9713    | 2.783      |
| 10 <sup>-3</sup>     | 0.0725  | 2.9537    | 2.323      |
| 10 <sup>-4</sup>     | 0.0516  | 2.8227    | 1.875      |
| 10 <sup>-5</sup>     | 0.0504  | 1.2647    | 1.423      |
| 10 <sup>-6</sup>     | 0.0497  | 0.2133    | 1.071      |
| 10 <sup>-7</sup>     | 0.0417  | 0.0641    | 0.891      |
| 10 <sup>-8</sup>     | 0.0629  | 0.0543    | 0.458      |

Supplementary Table 3 Receptors of Alphaviruses

| Virus | LDLR | LDLRAD3 | VLDLR | ApoER2 | MXRA8 |
|-------|------|---------|-------|--------|-------|
| GETV  | +    | -       | +     | +      | +     |
| SFV   | +    | -       | +     | +      | -     |
| BEBV  | +    | -       | n.a.  | n.a.   | +     |
| RRV   | +    | -       | n.a.  | n.a.   | +     |
| VEEV  | -    | +       | -     | -      | -     |
| CHIKV | -    | -       | -     | -      | +     |
| MAYV  | -    | -       | n.a.  | n.a.   | +     |
| MIDV  | -    | -       | n.a.  | n.a.   | +     |

+: serves as entry factor, -: does not serve as entry factor, n.a.: not analysed.

**Supplementary Table 4 Sequences of the primers used for PCR**

| <b>Gene</b>                    | <b>Sequence (5'-3')</b>                      |
|--------------------------------|----------------------------------------------|
| Mes- <i>Ldlr</i> -sg-F1        | caccGCCGGCAGCGGAACTCGTCCG                    |
| Mes- <i>Ldlr</i> -sg-R1        | aaacCGGACGAGTTCCGCTGCCGGC                    |
| Mes- <i>Ldlr</i> -sg-F2        | caccGGAAGTGGGAGGCCACACG                      |
| Mes- <i>Ldlr</i> -sg-R2        | aaacCGTGTGGGCTGCCAGTTCC                      |
| Mes- <i>Mxra8</i> -sg-F1       | caccGGTGTACGAGCCGCGACAA                      |
| Mes- <i>Mxra8</i> -sg-R1       | aaacTTGTCGCGGGCTCGTACACC                     |
| Mes- <i>Mxra8</i> -sg-F2       | caccG ACTCGTGGATATGTACTCGG                   |
| Mes- <i>Mxra8</i> -sg-R2       | aaacCCGAGTACATATCCACGAGTC                    |
| Sus- <i>LDLR</i> -sg-F1        | caccGTGATGGTGATCCTGACTGCG                    |
| Sus- <i>LDLR</i> -sg-R1        | aaacCGCAGTCAGGATCACCATCAC                    |
| Sus- <i>LDLR</i> -sg-F2        | caccGACAGCTCATCACTCCCGAG                     |
| Sus- <i>LDLR</i> -sg-R2        | aaacCTCGGGGAGTGATGAGCTGTC                    |
| pCDH-pLDLR-F                   | GATTCTAGAGCTAGCGAATTCATGAAGTCCACGGGCTGGG     |
| pCDH-pLDLR-R                   | ATCCTTGTAACTTTCGAACGCCACGTCATCCTCCAA         |
| pCDH-mes-LDLR-F                | GATTCTAGAGCTAGCGAATTCATGCGCACCGCGGATCTA      |
| pCDH-mes-LDLR-R                | ATCCTTGTAACTTTCGAATGCCACATCATCCTCCAGGC       |
| pCDH-mes-LDLRAD3-F             | GATTCTAGAGCTAGCGAATTCATGTGGCTGCTAGGGCCG      |
| pCDH-mes-LDLRAD3-R             | ATCCTTGTAACTTTCGAATACTTCTTCAGTGCCTCATTGG     |
| pCDH-mes-MXRA8-F               | GATTCTAGAGCTAGC GAATTC ATGGAAGTGTCTGTCTGTCTT |
| pCDH-mes-MXRA8-R               | ATCCTTGTAACTTTCGAA TTTGCAGTACTCCTTCTGAACTCT  |
| Pca-YH-pLDLR-F                 | TTTGGCAAAGAATTCATGAAGAGCACCGGGTGGG           |
| Pca-YH-pLDLR-R                 | CTTGTAGTCGGTACCGGCCACGTCATCCTCCAGG           |
| pCA-mes-LDLR-F                 | TTTGGCAAAGAATTCATGCGCACCGCGGATCTA            |
| pCA-mes-LDLR-R                 | CTTGTAGTCGGTACCTGCCACATCATCCTCCAGGC          |
| pCA-mes-LDLRAD3-F              | TTTGGCAAAGAATTCATGTGGCTGCTAGGGCCG            |
| pCA-mes-LDLRAD3-R              | CTTGTAGTCGGTACCTACTTCTTCAGTGCCTCATTGG        |
| pCA-mes-MXRA8-F                | TTTGGCAAAGAATTC ATGGAAGTGTCTGTCTGTCTT        |
| pCA-mes-MXRA8-R                | CTTGTAGTCGGTACCTTTGCAGTACTCCTTCTGAACTCT      |
| qPCR-BEBV-E2-F                 | AACTCTCCTTTCGTCCTAGA                         |
| qPCR-BEBV-E2-R                 | TTGCCGTGTTCCACGATAG                          |
| qPCR-SFV-E2-F                  | GAGATCCCTTGCACCACTTATC                       |
| qPCR-SFV-E2-R                  | CTTCTCCGACTGTGATCTTT                         |
| qPCR-RRV-E2-F                  | GTGCATGTTCCATCCCTTTG                         |
| qPCR-RRV-E2-R                  | GTCGGATGATCTGGGTGTAATC                       |
| qPCR-GETV-E2-F                 | AGAGAACTGACGGTAAACTG                         |
| qPCR-GETV-E2-R                 | CCATCTGTACTCGATCCCTTC                        |
| qPCR-human-GAPDH-F             | GCACCGTCAAGGCTGAGAAC                         |
| qPCR-human-GAPDH-R             | TGGTGAAGACGCCAGTGA                           |
| qPCR-PRV-F                     | GTCACCCGCGTGCTGATCGTCT                       |
| qPCR-PRV-R                     | GGCAACCACCGGCGCTACTTT                        |
| qPCR-SVV-F                     | GCTCCTGGCTCTAACCTACTAAT                      |
| qPCR-SVV-R                     | GACAAAAGTAACCATCGTCCTGCT                     |
| qPCR-hamster- $\beta$ -actin-F | GGTGG GAATGGGTCAGAAG                         |
| qPCR-hamster- $\beta$ -actin-R | AGCTCATTGTAGAAGGTG TGG                       |
